# Supplementary material for: Synergetic effect enhanced photoelectrocatalysis
Source: Royal Society of Chemistry journal article supplement (doi:10.1039/c5cc07425h), 2015-01-01
Supplement: c5cc07425h1.pdf [file c5cc07425h1.pdf]

## Supporting Information

### Synergetic Effect Enhanced Photoelectrocatalysis

Jingchun Jia, Jie Zhang, Fangfang Wang, Lianhuan Han, Jian-Zhang Zhou, Bing-Wei Mao, Dongping Zhan\*

State Key Laboratory of Physical Chemistry of Solid Surfaces, and Department of Chemistry, College of Chemistry and Chemical Engineering, Xiamen University, Xiamen 361005, China

#### S1 EXPERIMENTAL SECTION

##### Chemicals and Materials

All chemicals used in the experiments (KBr,  $\text{Fe}_2(\text{SO}_4)_3$ ,  $\text{H}_2\text{SO}_4$ , ethanol, Rhodamine B) are analytical grade or better provided by Sinopharm Co., China. All aqueous solutions are prepared with deionized water (18.2 M $\Omega$ , Milli-Q, Millipore Corp., France). ITO glass slides were washed in an ultrasonic cleaner by isopropanol and deionized water for several times and dried by blowing pure nitrogen gas. The slurry of  $\text{TiO}_2$  nanoparticles (average diameter: 20 nm,) is coated on the clean ITO substrate by doctor blading method to form a square  $\text{TiO}_2$  spot (500  $\mu\text{m}$  by 500  $\mu\text{m}$ ). The ITO slide is sintered at 450  $^\circ\text{C}$  for 2h in a muffle furnace. The area except the  $\text{TiO}_2$  spot is encapsulated by a thin insulating film before use. The images relevant to the photoanodes were shown in Figure S1.

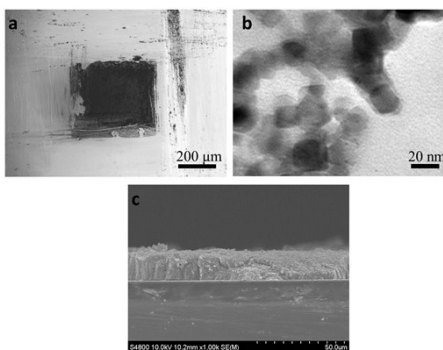

**Figure S1.** (a) Optical microscopy image of the square  $\text{TiO}_2$  spot, (b) transmission electron microscope (TEM) image of  $\text{TiO}_2$  nanoparticles, and (c) scanning electron microscope (SECM) image of the sectional view of  $\text{TiO}_2$  photoanode.

##### Instrumentation and Procedures

The SECM experiments are performed on a CHI 920c workstation (CH Instrument Co., USA). Together with a platinum counter electrode and an Ag/AgCl reference electrode, the photochemically generated  $\text{Br}_2$  is detected by a 25- $\mu\text{m}$ -diameter Pt UME (RG: 5). A Xenon lamp (Zolix Co., 0-100  $\text{mWcm}^{-2}$ ) is used as light source.

In the SECM experiments, the tip is fixed at a constant distance above the  $\text{TiO}_2$  spot. When the  $\text{TiO}_2$  spot is illuminated from the backside of the ITO slide, the steady-state tip current of  $\text{Br}_2$  reduction is recorded. The tip potential is held at 0.7 V vs. Ag/AgCl, at which  $\text{Fe}^{3+}$  is not reduced. From the tip currents at a series of tip-substrate distance, the approach curve of current feedback is plotted. The tip-substrate distance is calibrated by simulating the negative feedback curve of  $\text{Br}^-$  oxidation (tip potential: 1.0 V vs. Ag/AgCl) without illumination. The principles of the

current feedback are depicted in Figure 1a. The schematic diagram of the SECM measurements are shown in Figure S2.

To identify the autocatalytic effect of the  $\text{TiO}_2/(\text{Fe}^{3+}, \text{Br}^-)$  system, the photochemical etching of gallium arsenide (GaAs) as well as photodegradation of Rhodamine B are performed. An optical fiber (diameter: 100  $\mu\text{m}$ ) coated with  $\text{TiO}_2$  on the end face is fabricated as the SECM tip to generate the echant ( $\text{Br}_2$ ). The tip was positioned on the GaAs wafer with a distance of 1  $\mu\text{m}$ . The etching pits obtained at different photochemical system within same etching time are characterized by confocal laser microscopy (Keyence, VK-X100/X200). As for the degradation of Rhodamine B, a 5-mm-diameter facula was used to illuminate the  $\text{TiO}_2/\text{ITO}$  substrate while the UV-visible spectra were recorded (UV-2550, SHIMADZU Co., 400 -700 nm).

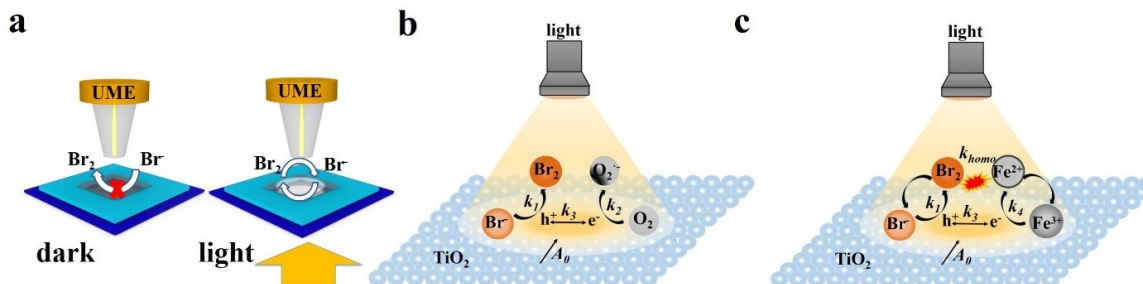

Figure S2. (a) Schematic diagrams of SECM negative (dark) and positive (light) feedback modes of photochemical oxidation of bromide ion, (b) Schematic diagram of  $\text{TiO}_2/(\text{O}_2, \text{Br}^-)$  photochemical system, and (c) Schematic diagram of the synergetic effect of  $\text{TiO}_2/(\text{Fe}^{3+}, \text{Br}^-)$  photochemical system.

### Experimental feasibility

Since  $\text{TiO}_2$  has a high bandgap, the potentials of photogenerated charges are sufficient to be injected into  $\text{Fe}^{3+}$  and  $\text{Br}^-$ . It is well known, in the acid solution, the redox couple  $\text{Fe}^{3+}/\text{Fe}^{2+}$  is very reversible. In other words, the photogenerated electron is very easy to be captured by  $\text{Fe}^{3+}$ . Once this process happens, the whole processes is started. The standard potential of  $\text{Fe}^{3+}/\text{Fe}^{2+}$  and  $\text{Br}_2/\text{Br}^-$  are 0.771 V and 1.087 V vs. SHE. Although the standard potential of  $\text{O}_2/\text{H}_2\text{O}_2$  is 0.695 V vs. SHE. However, the kinetical rate of oxygen reduction is slower than that of  $\text{Fe}^{3+}$ . Most importantly, the subsequently homogeneous reaction between  $\text{Br}_2$  and  $\text{Fe}^{2+}$  enhanced the mass transfer in the interfacial region. Consequently, the interfacial transfer of the photogenerated charges are promoted. The the potential of involved species are schemed in Figure S3.

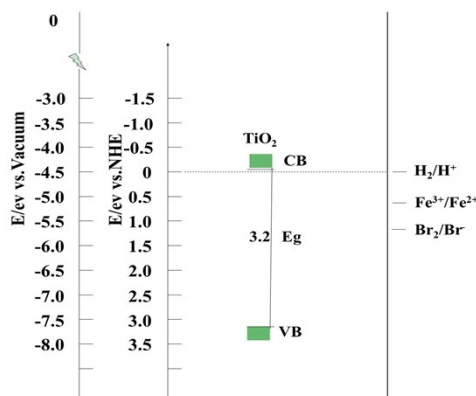

Figure S3 Oxidation levels of  $\text{Br}_2/\text{Br}^-$  and  $\text{Fe}^{3+}/\text{Fe}^{2+}$ , and the band edges of  $\text{TiO}_2$ .

## S2. THEORIES AND SIMULATIONS

The mechanism and numerical analysis of photochemical reduction of oxygen ( $O_2$ ) have been reported previously.<sup>1</sup> Here, we discuss the photochemical process for the system of  $TiO_2/(O_2, Br^-)$ , in which  $O_2$  and  $Br^-$  serve as the electron and hole acceptor, respectively, but no subsequent homogenous reaction can occur. Figure 1b shows the two charge transfer half-reactions when  $TiO_2$  photoelectrode is illuminated<sup>1,2</sup>:

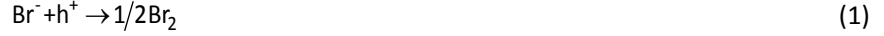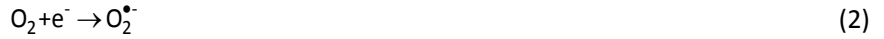

Here, we define  $[e^-]$  and  $[h^+]$  as the effective concentration of the transferred electrons and holes,  $[O_2]$  and  $[Br^-]$  the concentration of  $O_2$  and  $Br^-$  at the  $TiO_2$ /electrolyte interface,  $k_1$  the rate constant of interfacial hole transfer,  $k_2$  the rate constant of interfacial electron transfer,  $k_3$  the rate constant of charge recombination of electrons and holes, and  $A_0$  the effective flux of the separated electrons and holes when the  $TiO_2$  photoelectrode is illuminated.<sup>3</sup>

At the steady state, the balances for the transferred electrons and holes are given by:

$$\frac{d[e^-]}{dt} = A_0 - k_2[e^-][O_2] - k_3[e^-][h^+] = 0 \quad (3)$$

$$\frac{d[h^+]}{dt} = A_0 - k_1[h^+][Br^-] - k_3[e^-][h^+] = 0 \quad (4)$$

The above equations can be simplified as:

$$[e^-] = \frac{A_0}{k_3[h^+] + k_2[O_2]} \quad (5)$$

$$[h^+] = \frac{A_0}{k_3[e^-] + k_1[Br^-]} \quad (6)$$

Thus,  $[h^+]$  can be derived as following:

$$[h^+] = \frac{k_2[O_2]}{2k_3} \left\{ \left[ \frac{4k_3A_0}{k_1k_2[O_2][Br^-]} + 1 \right]^{1/2} - 1 \right\} \quad (7)$$

Suppose Reaction (1) is a first-order reaction, the photochemical oxidation rate of  $Br^-$  to  $Br_2$  is:

$$r = \frac{k_1k_2[Br^-][O_2]}{2k_3} \left\{ \left[ \frac{4k_3A_0}{k_1k_2[O_2][Br^-]} + 1 \right]^{1/2} - 1 \right\} \quad (8)$$

If the effective amount of photogenerated electrons and holes  $A_0$  is large sufficiently, Equation (8) can be simplified as:

$$r = \left( \frac{A_0k_1k_2}{k_3} \right)^{1/2} [Br^-]^{1/2} [O_2]^{1/2} \quad (9)$$

and be rewritten as:

$$r = K_a [Br^-]^{1/2} [O_2]^{1/2} \quad (10)$$

where  $K_a$ , equal to  $k_1(A_0k_2/k_3)^{1/2}$ , is the apparent rate constant of the net charge transfer across the  $TiO_2$ /solution interface. It should be noted that, according to the principle of electroneutrality, equation (10) also applies to the interfacial oxygen reduction.

However, it is well known the solubility of  $O_2$  in water is as low as 0.25 mM at 1 atm and 25 °C after purging the solution with pure  $O_2$  to saturation<sup>4</sup>. It is anticipated that either the mass transfer or the slow kinetics of  $O_2$  reduction would hinder the photochemical conversion rate. We therefore replace the  $O_2$  with  $Fe^{3+}$  as the electron acceptor, and the interfacial charge transfer caused by light illumination can be expressed as:

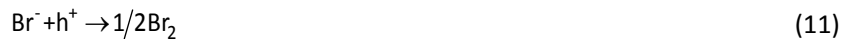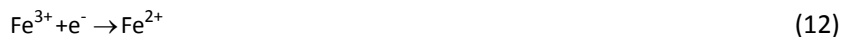

A distinct feature of the  $\text{TiO}_2/(\text{Fe}^{3+}, \text{Br}^-)$  system from that of  $\text{TiO}_2/\text{O}_2, \text{Br}^-$  is that a subsequent homogeneous reaction can occur between  $\text{Br}_2$  and  $\text{Fe}^{2+}$  in the electrolyte solution, which regenerates the electron acceptor ( $\text{Fe}^{3+}$ ) and hole acceptor ( $\text{Br}^-$ ) to form a mass transfer loop at the  $\text{TiO}_2/\text{solution}$  interface (Figure S1c):

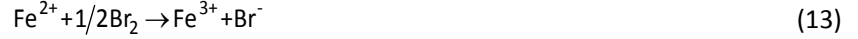

Note that it is the Reaction (13) that realizes the autocatalysis of the interfacial charge-transfer processes, and enhances the photochemical conversion rate. Similarly, if the amount of photogenerated electrons and holes are sufficient, the interfacial charge transfer rate can be derived:

$$r = K_b [\text{Br}^-]^{1/2} [\text{Fe}^{3+}]^{1/2} \quad (14)$$

where,  $K_b$ , equal to  $k_1(A_0k_2/k_4)^{1/2}$ , is the apparent rate constant of the net charge transfer across the  $\text{TiO}_2/\text{solution}$  interface. Due to the autocatalytic effect, the interfacial concentration of  $\text{Br}^-$  and  $\text{Fe}^{3+}$  is relevant to the kinetic rate of Reaction (13). Note that in Equation (10) and (14), the interfacial charge transfer rates,  $r$ , depend on the interfacial concentration of  $\text{O}_2$  or  $\text{Fe}^{3+}$  in addition to  $\text{Br}^-$ .

The axisymmetric geometry used to study the interfacial charge transfer of photochemical processes are shown in Figure S2, where the scanning tip is a 25- $\mu\text{m}$ -diameter Pt UME with a RG (defined as the radius ratio between the Pt wire and the sealing glass) of 5 and the substrate is a  $\text{TiO}_2$  disc photoelectrode with a radius of 250  $\mu\text{m}$ . The tip potential is held at 0.7 V to collect the photogenerated  $\text{Br}_2$ . In the steady-state limit, the mass transfer of the reactants and products in the  $\text{TiO}_2/\text{O}_2, \text{Br}^-$  system abide by the Fick's 2<sup>nd</sup> law:

$$\frac{\partial C_i}{\partial t} = D_i \nabla^2 C_i \quad (15)$$

where  $C_i$  and  $D_i$  is the concentration and diffusion coefficient, respectively, of species  $i$  in the solution, and  $i$  represents  $\text{Br}^-$ ,  $\text{Br}_2$ ,  $\text{O}_2$ , or  $\text{O}_2^{\bullet-}$ .

On the insulative Boundary 1, 4, 5 and 8, there are no normal fluxes for all the species  $i$ , which are described by

$$\nabla C_i \cdot \hat{n} = 0 \quad (16)$$

where,  $\hat{n}$  is the inward unit vector normal to the surface.

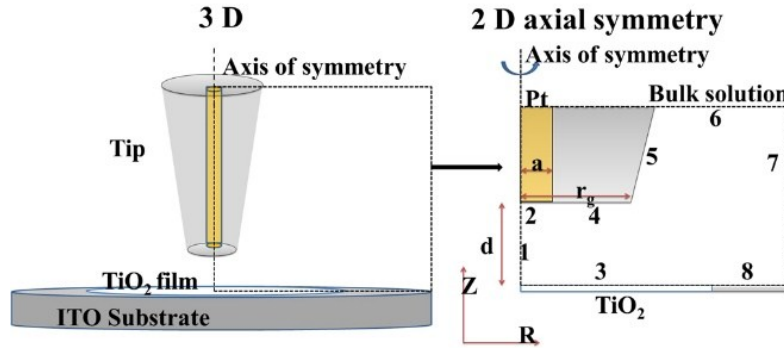

**Figure S4. Schematic diagram of the axisymmetric geometry used for the simulation of photochemical processes with a tip radius of 12.5  $\mu\text{m}$  and a RG of 5. The numbers in bold represent the boundary conditions as defined in the text.**

On the Boundary 2, the surface concentration of  $\text{Br}^-$  equals to its bulk concentration ( $C_{\text{Br}^-}^*$ ) while the surface concentration of  $\text{Br}_2$  is zero:

$$C_{\text{Br}^-} = C_{\text{Br}^-}^*, \quad C_{\text{Br}_2} = 0 \quad (17)$$

On the Boundary 3, the interfacial fluxes of  $\text{Br}_2$  and  $\text{Br}^-$  are expressed as:

$$-D_{\text{Br}_2} \nabla C_{\text{Br}_2} \cdot \hat{n} = K_d C_{\text{O}_2}^{1/2} C_{\text{Br}^-}^{1/2} \quad (18)$$

$$-D_{\text{Br}^-} \nabla C_{\text{Br}^-} \cdot \hat{n} = -\frac{1}{2} K_d C_{\text{O}_2}^{1/2} C_{\text{Br}^-}^{1/2} \quad (19)$$

On the boundary 6 and 7, the concentrations of all species equal to their bulk concentrations:

$$C_{Br^-} = C_{Br^-}^*, C_{Br_2} = 0, C_{O_2} = C_{O_2}^*, C_{O_2^{\cdot-}} = 0 \quad (20)$$

The current at the Pt UME probe is defined by equation (21):

$$i_{tip} = \int_0^a nFD \left( \frac{\partial C_{Br_2}}{\partial Z} \right) \cdot 2\pi R dR \quad (21)$$

where,  $n$  is the stoichiometric number of electron involved in the tip electrode reaction, and  $F$  is the faradaic constant.

In the case of the autocatalytic  $TiO_2/Fe^{3+}, Br^-$  system, the Fick's 2<sup>nd</sup> law changes due to the subsequent homogeneous reaction:

$$\frac{\partial C_{Br^-}}{\partial t} = D_{Br^-} \nabla^2 C_{Br^-} + K_{homo} C_{Br_2} C_{Fe^{2+}} \quad (22)$$

$$\frac{\partial C_{Br_2}}{\partial t} = D_{Br_2} \nabla^2 C_{Br_2} - K_{homo} C_{Br_2} C_{Fe^{2+}} \quad (23)$$

$$\frac{\partial C_{Fe^{3+}}}{\partial t} = D_{Fe^{3+}} \nabla^2 C_{Fe^{3+}} + K_{homo} C_{Br_2} C_{Fe^{2+}} \quad (24)$$

$$\frac{\partial C_{Fe^{2+}}}{\partial t} = D_{Fe^{2+}} \nabla^2 C_{Fe^{2+}} - K_{homo} C_{Br_2} C_{Fe^{2+}} \quad (25)$$

The boundaries are similar as long as the  $O_2$  and  $O_2^{\cdot-}$  are substituted by  $Fe^{3+}$  and  $Fe^{2+}$ .  $K_{homo}$  is the rate constant in Equation (14), which is simulated based on the experiment results.

A commercial finite element modelling package (COMSOL Multiphysics 4.3b) was employed to simulate the above photochemical processes. The involved constant are:  $D_{Br_2} = 1.77 \times 10^{-9} \text{ m}^2 \text{ s}^{-1}$ ,<sup>5</sup>  $D_{O_2} = 1.98 \times 10^{-9} \text{ m}^2 \text{ s}^{-1}$ ,<sup>6</sup>  $D_{Fe^{3+}} = 2.5 \times 10^{-9} \text{ m}^2 \text{ s}^{-1}$ .<sup>7</sup> Fitting theoretical approach curves to experimental ones, the kinetics of the photoinduced interfacial charge transfer and the subsequently homogeneous reaction can be derived.

### S3 Photochemical degradation of Rhodamine B

If a competing reaction pathway is introduced into the  $TiO_2/(Fe^{3+}, Br^-)$  system, three possible cases will be taken place: (1) If the reaction rate between  $Br_2$  and Rhodamine B is much faster than that between  $Br_2$  and  $Fe^{2+}$ , the produced  $Br_2$  will react mainly with Rhodamine B. it results in a net consumption of  $Fe^{3+}$ , which may make the interfacial charge transfer ceased. (2) If the reaction rate between  $Br_2$  and Rhodamine B is much slower than that between  $Br_2$  and  $Fe^{2+}$ , Rhodamine B will hardly be degraded. (3) If the reaction rate between  $Br_2$  and Rhodamine B is comparable with that between  $Br_2$  and  $Fe^{2+}$ , a new equilibrium should be established for the whole system. In this case, new mass and charge balance will be achieved for both the precursors of  $Fe^{3+}$  and  $Br^-$ . Comparing Figure 4c and Figure 4d, it is essential to use a sufficient concentration of  $Fe^{3+}$  to maintain the mass balance and accelerated the degradation process. It should be noted that in the degradation and etching experiment the solution is not degassed. Moreover, it is well known that  $Fe^{2+}$  is not stable in aqueous solution, and very easy to lose an electron to the photogenerated  $Br_2$ , the dissolved  $O_2$ , or the directly to the illuminated  $TiO_2$  to maintain the balance of the precursor  $Fe^{3+}$ . From the results shown in Figure 4 and Figure 5 in the main text, we are inclined to consider that the Case 3 is mostly happened. Similar analysis is applied to the etching of GaAs wafer. The schematic diagram of the mechanisms is shown in Figure S5b.

a

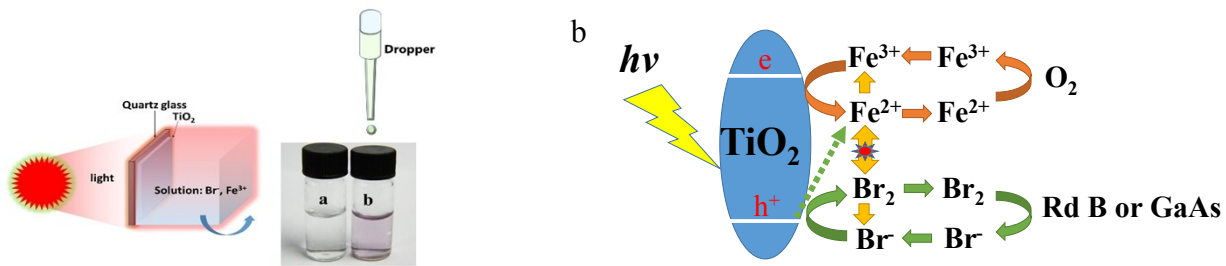

**Figure S5** (a)  $\text{TiO}_2$ /(1.0 mM  $\text{Fe}^{3+}$ , 5.0 mM  $\text{Br}^-$ ) photochemical system is capable of producing net bromine. Bottle a: before illumination; Bottle b: After 20 minutes' illumination. When a drop of N,N-dimethyl-p-phenylenediamine (DPD) is added in, the color of the electrolyte changes into pink. (b) the mechanisms for photodegradation of Rhodamine B(RbB).

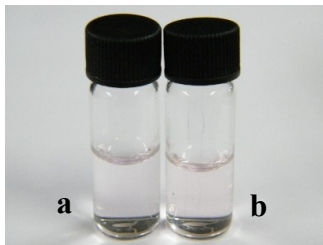

**Figure S6** (a) The photodegradation of Rhodamine B by  $\text{TiO}_2$ /(50 mmol  $\text{H}_2\text{SO}_4$ , 5 mmol  $\text{KBr}$ , 1 mmol  $\text{Fe}^{3+}$ ). The light intensity of Xenon light is  $50 \text{ mW}\cdot\text{cm}^{-2}$ , the illumination time is 60 min and the diameter of illumination area of  $\text{TiO}_2$  photoelectrode is 5 mm; (b) The direct reaction between Rhodamine B and  $\text{Br}_2$  in the solution containing 50 mmol  $\text{H}_2\text{SO}_4$ . This result elucidate  $\text{Br}_2$  has the capability to degrade Rhodamine B.

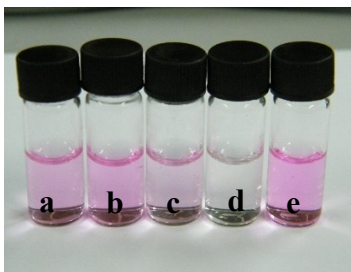

**Figure S7** (a)-(d) are photodegradation results of Rhodamine B which corresponding to the (a)-(d) of Figure 4 in the text. (e) the solution before illumination.

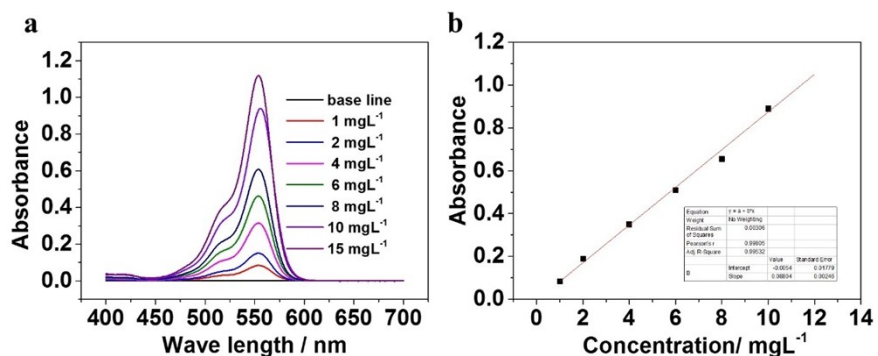

**Figure S8** The calibration curve of the concentration of Rhodamine B.

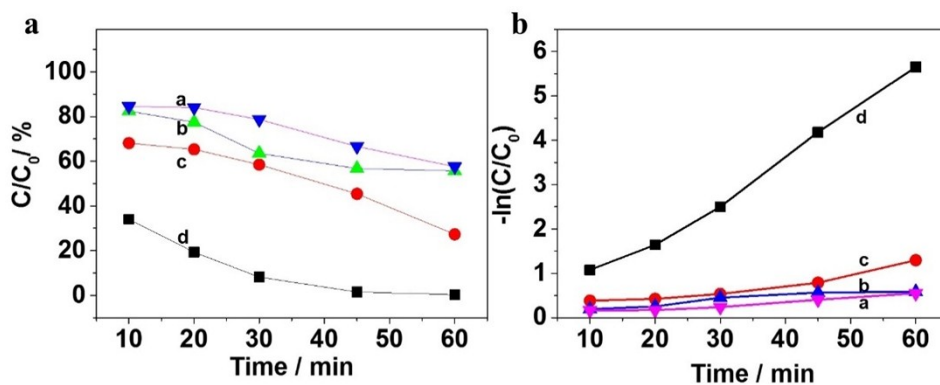

**Figure S9** The calculation results of the data shown in Figure 4 in the text based on the calibration curve shown in Figure S8. From the linear relationship between  $-\ln(C/C_0)$  and illumination time, the photodegradation rates are derived.

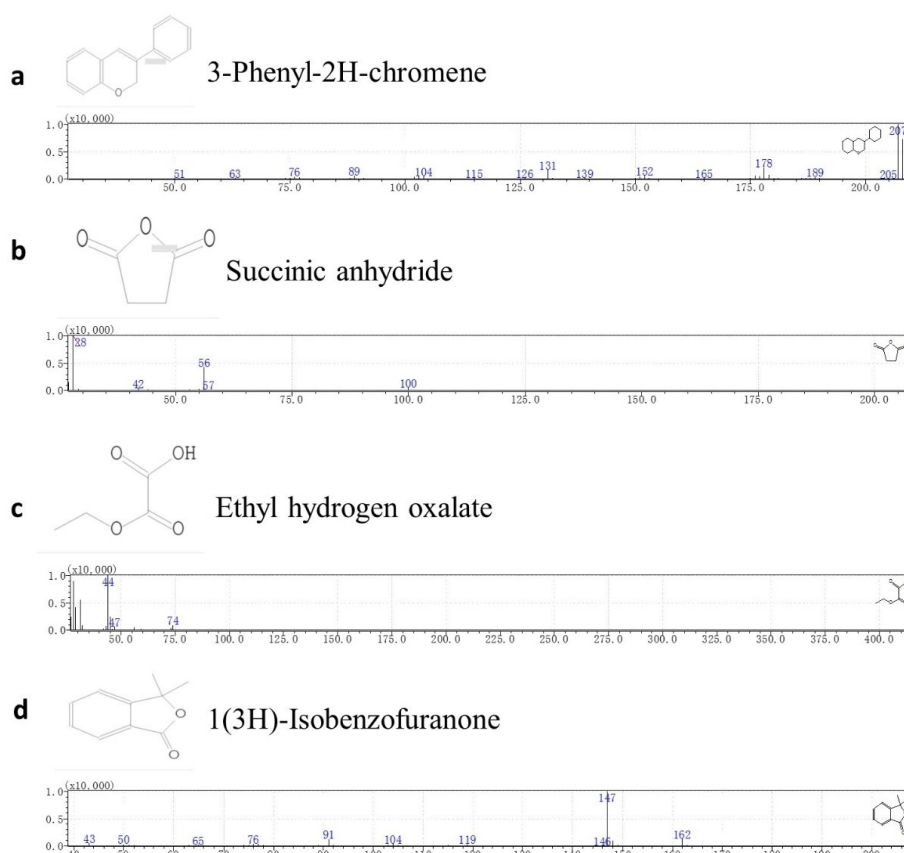

**Figure S10** Mass spectra of degradation products, (a) 3-Phenyl-2H-chromene, (b) Succinic anhydride-2,5-Furandione, (c) Ethyl hydrogen oxalate, (d) 1(3H)-Isobenzofuranone. The results show that no bromination reaction but homogeneous redox reaction between Rhodamine B and  $Br_2$  occurs. There are no new pollutants, i.e., organic bromides, produced during the photodegradation process. The results indicate a green chemistry.

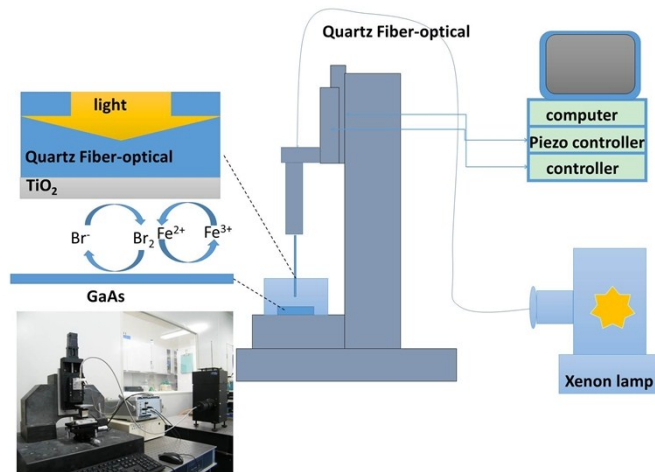

**Figure S11** The home made SECM instrument with an optical fiber tip coated with TiO<sub>2</sub> nanoparticles for the etching process on GaAs wafer.

#### REFERENCES

- (1) Kesselman, J. M.; Shreve, G. A.; Hoffmann, M. R.; Lewis, N. S. *J. Phys. Chem.* **1994**, *98*, 13385.
- (2) Reichman, B.; Byvik, C. E. *J. Phys. Chem.* **1981**, *85*, 2255.
- (3) Fonseca, S. M. M. C. d., University of Warwick, 2002.
- (4) Fonseca, S. M.; Barker, A. L.; Ahmed, S.; Kemp, T. J.; Unwin, P. *PCCP* **2004**, *6*, 5218.
- (5) Zhang, J.; Jia, J.; Han, L.; Yuan, Y.; Tian, Z.-Q.; Tian, Z.-W.; Zhan, D. *The J. Phys. Chem. C* **2014**, *118*, 18604-18611.
- (6) Han, P.; Bartels, D. M. *The J. Phys. Chem.* **1996**, *100*, 5597.
- (7) Amira, S.; Spångberg, D.; Probst, M.; Hermansson, K. *The J. Phys. Chem. B* **2004**, *108*, 496.
